# Supplementary material for: Wnt16 Signaling Is Required for IL-1β-Induced Matrix Metalloproteinase-13-Regulated Proliferation of Human Stem Cell-Derived Osteoblastic Cells
Source: MDPI journal article supplement (doi:10.3390/ijms17020221), 2016-02-06
Supplement: s1 [file s1]

# Supplementary Materials: Wnt16 Signaling Is Required for IL-1 $\beta$ -Induced Matrix Metalloproteinase-13-Regulated Proliferation of Human Stem Cell-Derived Osteoblastic Cells

Nobuaki Ozeki, Makio Mogi, Naoko Hase, Taiki Hiyama, Hideyuki Yamaguchi, Rie Kawai, Ayami Kondo and Kazuhiko Nakata

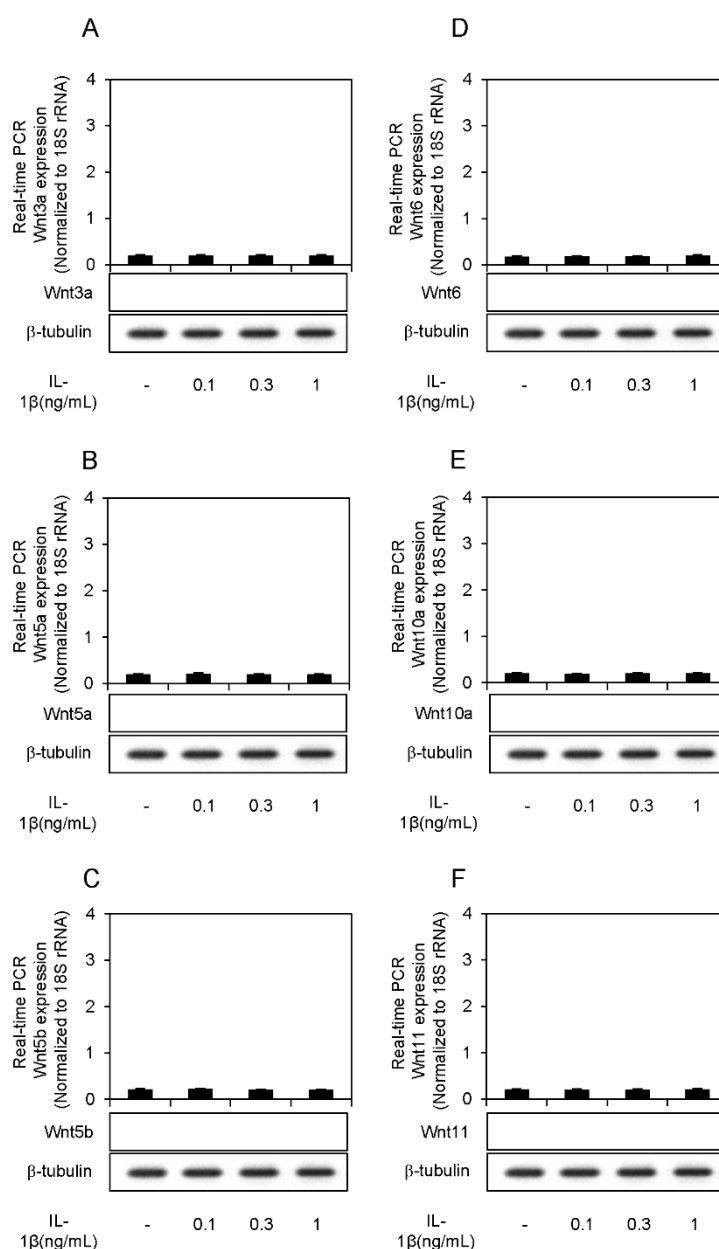

**Figure S1.** IL-1 $\beta$ -induced expression of Wnt3a, Wnt5a, Wnt5b, Wnt6, Wnt10a, and Wnt11 mRNAs and proteins in  $\alpha$ 7hSMSC-OB cells. (A–F) Cells were treated with IL-1 $\beta$  (0, 0.1, 0.3 and 1 ng/mL), followed by real-time qPCR analysis of each Wnt mRNA relative to the control (18S rRNA). Data are the mean  $\pm$  SD of four independent experiments. Western blot analysis of each Wnt protein and  $\beta$ -tubulin was performed following stimulation with IL-1 $\beta$  (lower panels). Blots shown are representative of three independent experiments.

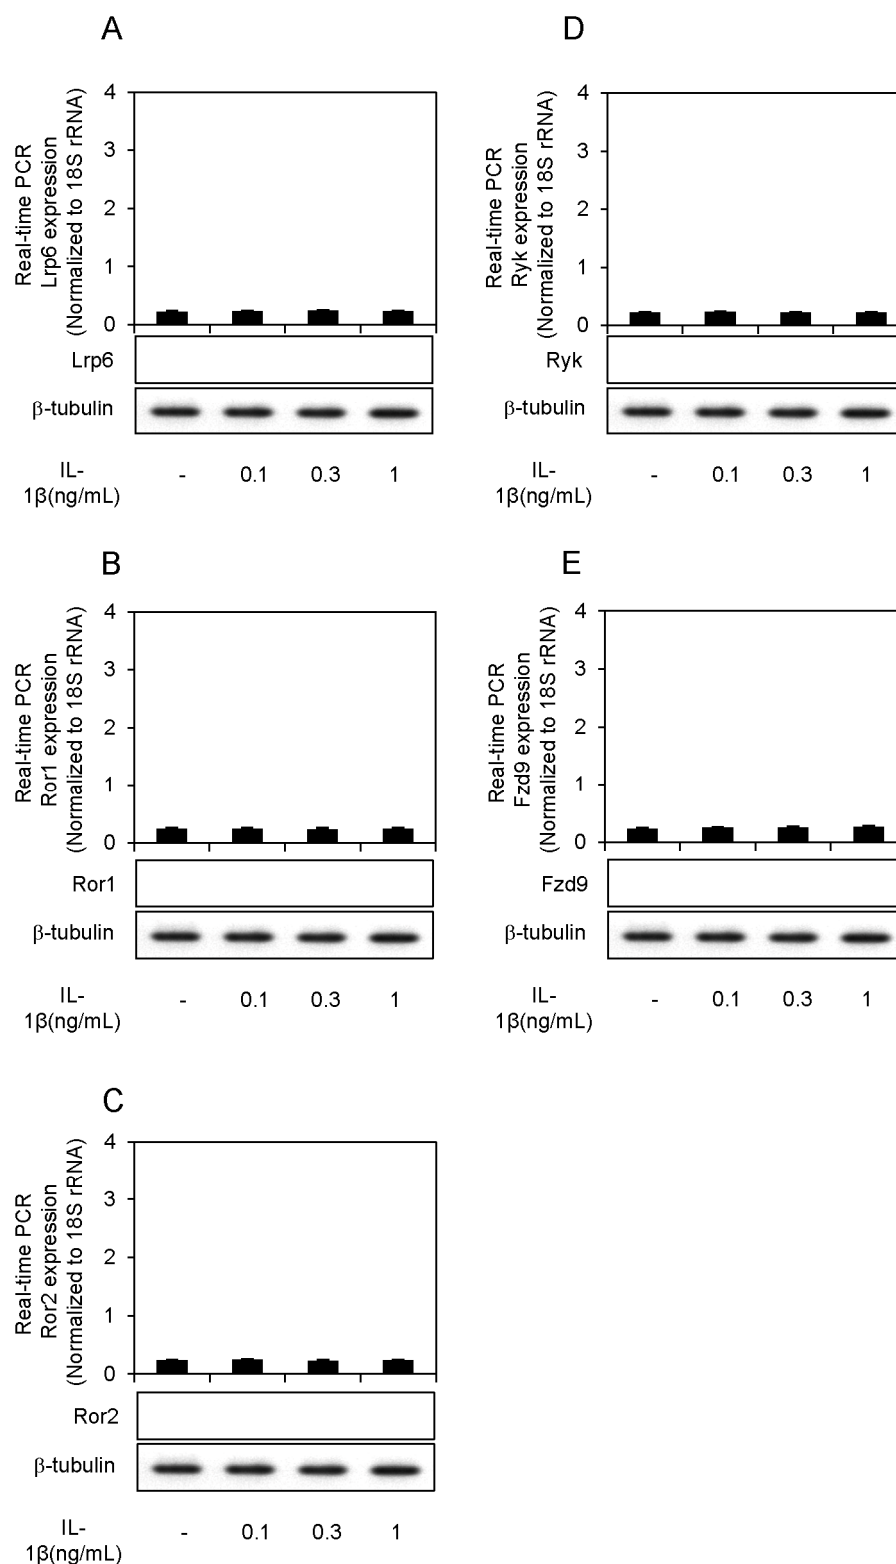

**Figure S2.** IL-1 $\beta$ -induced expression of Lrp6, Ror1, Ror2, Ryk, and Fzd9 mRNAs and proteins in  $\alpha$ 7hSMSC-OB cells (A–E) Cells were treated with IL-1 $\beta$  (0, 0.1, 0.3 and 1 ng/mL), followed by real-time qPCR analysis of each mRNA relative to the control (18S rRNA). Data are the mean  $\pm$  SD of four independent experiments. Western blot analysis of Lrp6, Ror1, Ror2, Ryk and Fzd9 and  $\beta$ -tubulin protein levels was performed following stimulation with IL-1 $\beta$  (lower panels). Blots shown are representative of three independent experiments.
